# Supplementary material for: Spontaneously hypertensive rats can become hydrocephalic despite undisturbed secretion and drainage of cerebrospinal fluid
Source: PubMed Central journal article supplement (PMC10318838; doi:10.1186/s12987-023-00448-x), 2023-07-04
Supplement: 12987_2023_448_MOESM1_ESM.pdf [file 12987_2023_448_MOESM1_ESM.pdf]

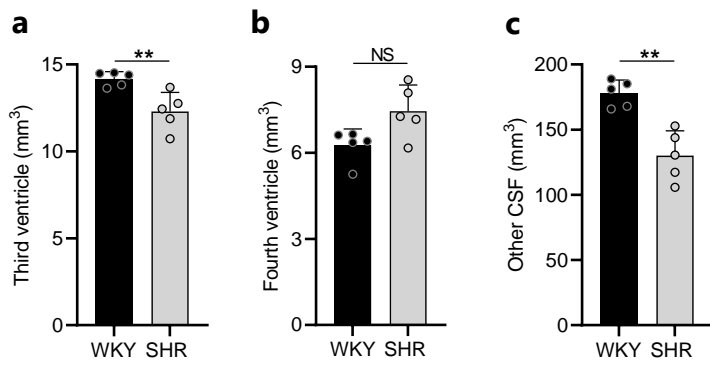

**Fig. S1. CSF volumes in SHRs and WKY rats.** **a** Third ventricle volumes in WKY rats ( $14.2 \pm 0.4$  mm<sup>3</sup>, n = 5) and SHRs ( $12.3 \pm 1.1$  mm<sup>3</sup>, n = 5) quantified by MRI. **b** Fourth ventricle volumes in WKY rats ( $6.3 \pm 0.6$  mm<sup>3</sup>, n = 5) and SHRs ( $7.5 \pm 0.9$  mm<sup>3</sup>, n = 5) quantified by MRI. **c** Other CSF volumes in WKY rats ( $178 \pm 10$  mm<sup>3</sup>, n = 5) and SHRs ( $130 \pm 19$  mm<sup>3</sup>, n = 5) quantified by MRI. Data are presented as mean  $\pm$  standard deviation and statistical significance was tested with an unpaired two-tailed t-test or a Mann-Whitney test depending on normality. \*\* P < 0.01. NS = not significant.

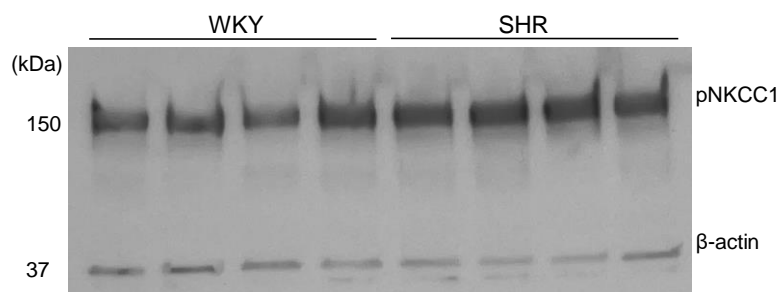

**Fig. S2. Western blot.** Raw western blot of choroid plexus acutely isolated from WKY rats (n = 4) and SHRs (n = 4) stained with anti-pNKCC1 and anti  $\beta$ -actin antibodies.
